# Supplementary material
Source: PubMed Central journal article supplement (PMC3902104)
Supplement: NIHMS540708-supplement-Supp_Figure_S1-S4___Table_S1-S2.pdf [file NIHMS540708-supplement-Supp_Figure_S1-S4___Table_S1-S2.pdf]

**Supplementary Table 1.****Primers Used for constructs.**

| <b>Primer Name</b> | <b>Sequence 5'-3'</b>                          | <b>Specification</b>                                                         |
|--------------------|------------------------------------------------|------------------------------------------------------------------------------|
| IdeRRev524         | GCTAGCTGAACGTGCTCGGTA                          | 3' end of <i>ideR</i>                                                        |
| IdeRFw4            | ATGCATAACGAGTTGGTTGATA                         | 5' end of <i>ideR</i>                                                        |
| PptrIdeRFw7        | ACACGAGGCCCTTTTCGTCTTTCAA                      | Forward primer for confirmation of <i>ideR</i> conditional mutant            |
| PptrIdeRRev900     | TCAGACTTTCTCGACCTTGACCGC                       | Reverse primer for the confirmation of <i>ideR</i> conditional mutant        |
| BfrBpSM232Fw       | AGACAATTGCGGATCCATGACAGAAT<br>ACGAAGGGCCTAAGAC | Forward in fusion primer to amplify <i>bfrB</i> and BamHI site of pMV261.    |
| BfrBpSM232Rev      | TTCTGCAGCTGGATCCAACGGGACC<br>ACTCGCTGAT        | Reverse infusion primer to amplify <i>bfrB</i> and BamHI site of pMV261      |
| BfrA Fw pMV261     | GACAATTGCGGATCCGCCACGACAG                      | Forward infusion primer to amplify <i>bfrA</i> BamHI site of pMV261          |
| BfrARev pMV261     | TTCTGCAGCTGGATCCAGTGGTATCG                     | Reverse infusion primer to amplify <i>bfrA</i> gene and BamHI site of pMV261 |

Supplementary Table 2.

**Primers used for qRT-PCR**

| <b>Primer name</b> | <b>Sequence 5'-3'</b>   | <b>Specification</b>           |
|--------------------|-------------------------|--------------------------------|
| 16S UP#2           | ATGACGGCCTTCGGGTTGTTA   | Forward primer for 16S RNA     |
| 16S Rev#2          | CGGCTGCTGGCACGTAGTTG    | Reverse primer for 16S RNA     |
| Rv2383cF           | GCGACTTTCCCATCAGTGTT    | Forward primer for <i>mbtB</i> |
| Rv2383cR           | TAATAACGTCAACGCAAGTTCCG | Reverse primer for <i>mbtB</i> |
| Rv1348F            | TCTATCTGTTCGTGGACTG     | Forward primer for <i>irtA</i> |
| Rv1348R            | CTTCGCCGTTTCATCTTCTCT   | Reverse primer for <i>irtA</i> |
| Rv3841F244         | CGAAACCAGTTCGACAGACC    | Forward primer for <i>bfrB</i> |
| Rv3841R546         | GCAAGAACCACTGCATGAAC    | Reverse primer for <i>bfrB</i> |

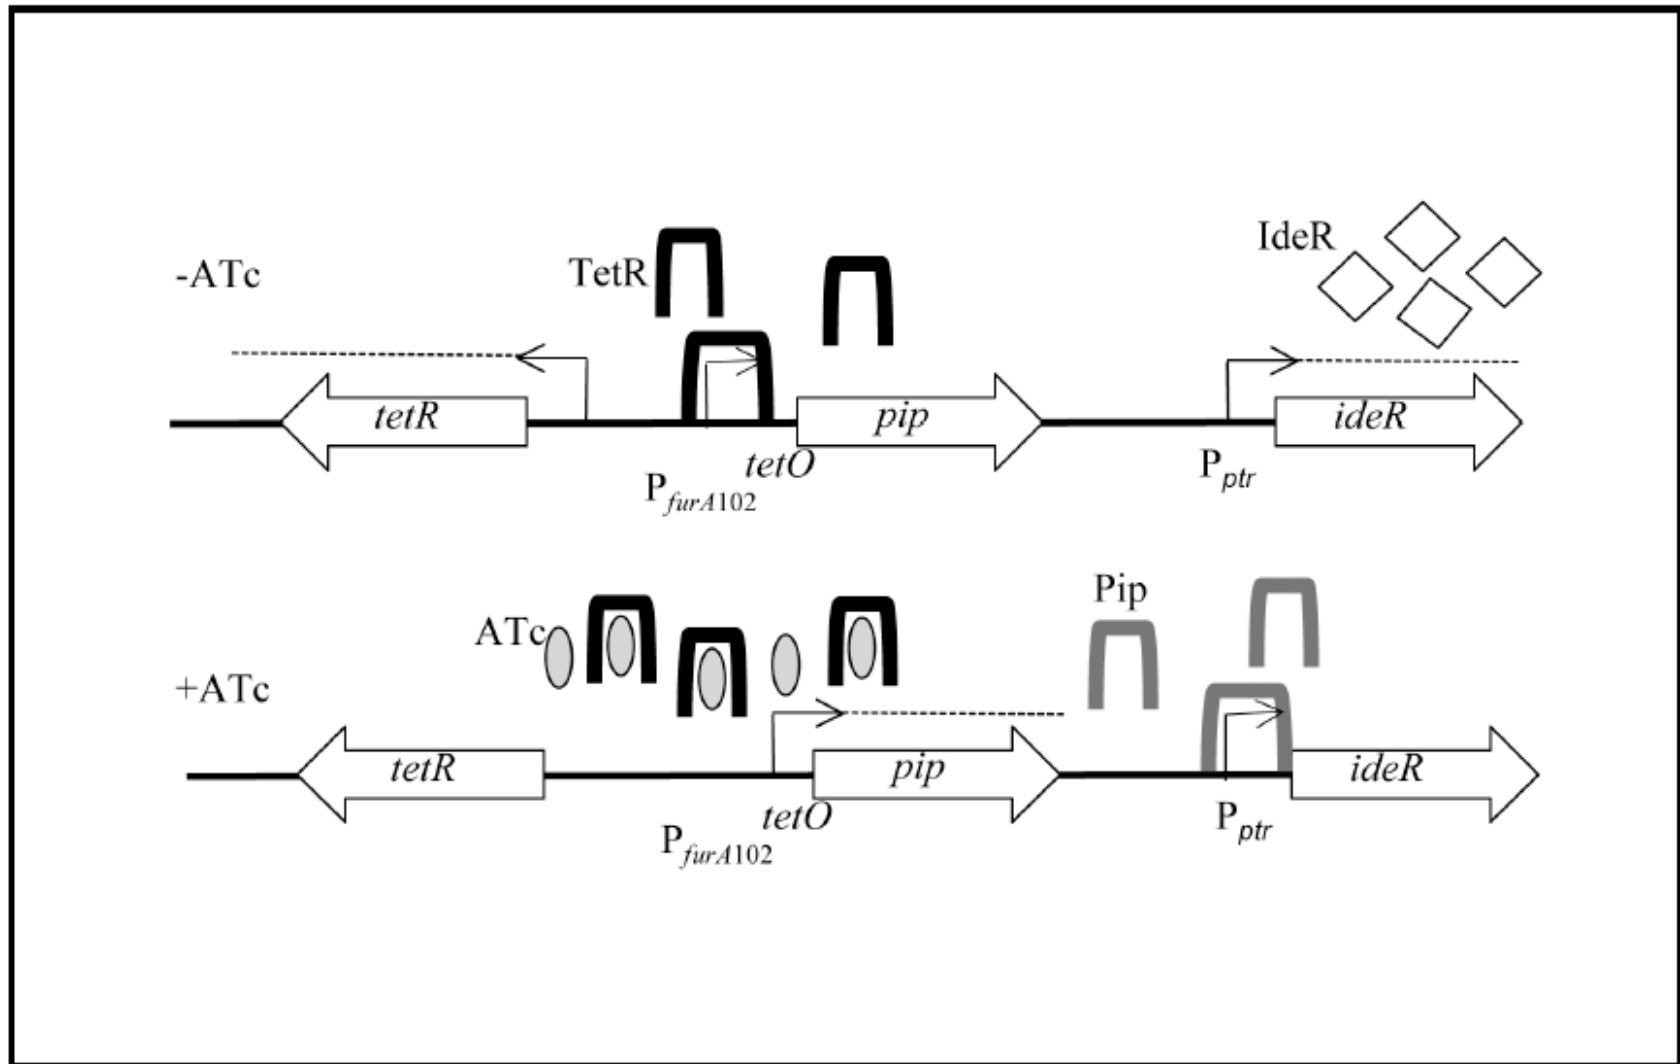

**Figure S1. Control of *ideR* expression in ST217.** The native *ideR* promoter was replaced by a Pip repressible promoter by homologous recombination as described in Materials and Methods in TB38.2 which has the *tetR* and *pip* integrated in the chromosome. In the absence of tetracycline (ATc), TetR binds to its operator repressing *pip* transcription and allowing *ideR* expression. In the presence of ATc, *pip* is transcribed and Pip represses *ideR* expression.

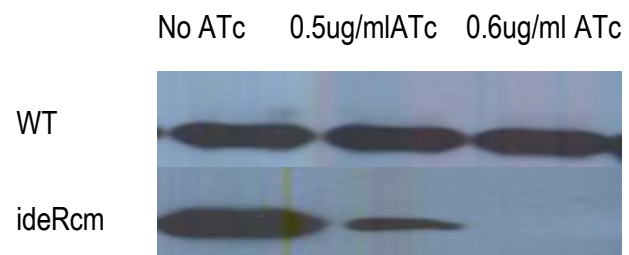

**Figure S2. IdeR protein in the wild type and the *ideR* conditional.** Wild type and the *ideR* conditional mutant were grown in 7H9. Protein extracts were obtained as described in Materials and Methods. Levels of IdeR were detected by Immunoblotting using anti-IdeR antibodies.

A

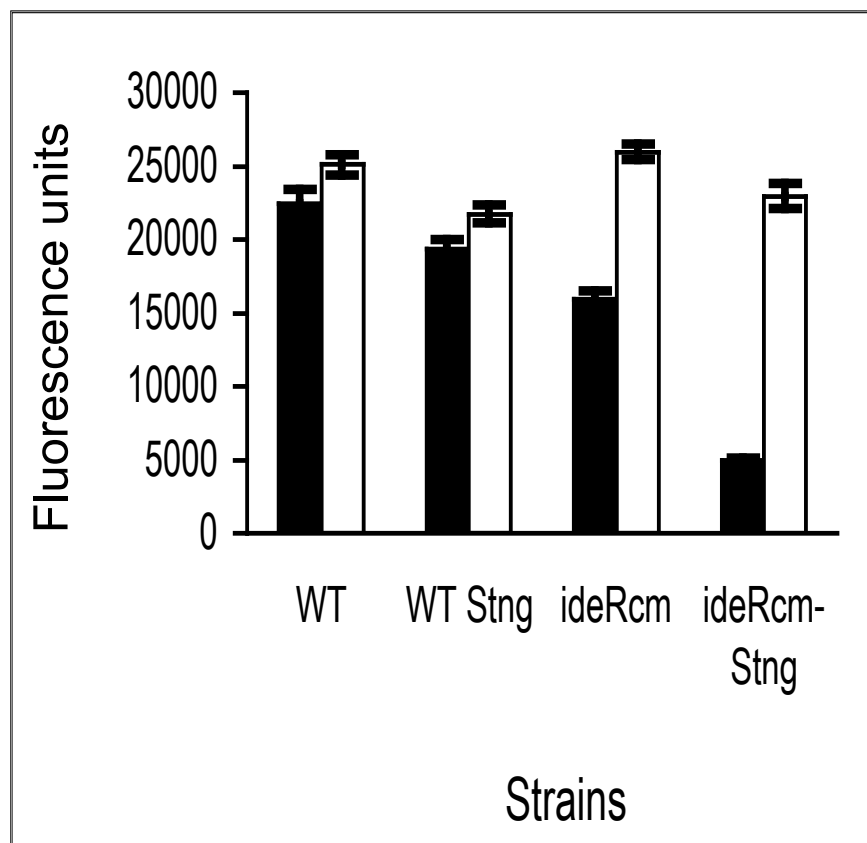

B

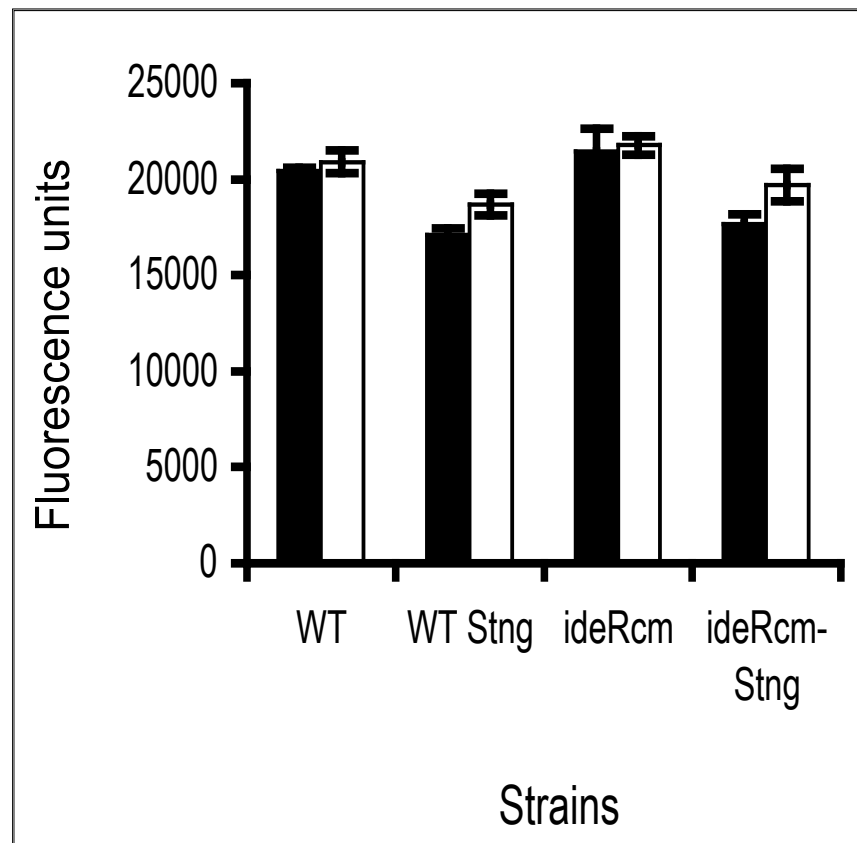

**Figure S3. Sensitivity to Streptonigrin.** The *ideR* conditional mutant (*ideRcm*) and the parental wild type strain (WT) were cultured in HIMM(A) or LMM (B) with ATc (dark bars) or without ATc (open bars) and with and without 0.6  $\mu\text{g}\cdot\text{ml}^{-1}$  streptonigrin (Stng). The data corresponds to the fluorescence resulting from reduction of Alamar Blue by each strain. Shown are mean values  $\pm$  standard deviations of three biological replicates.

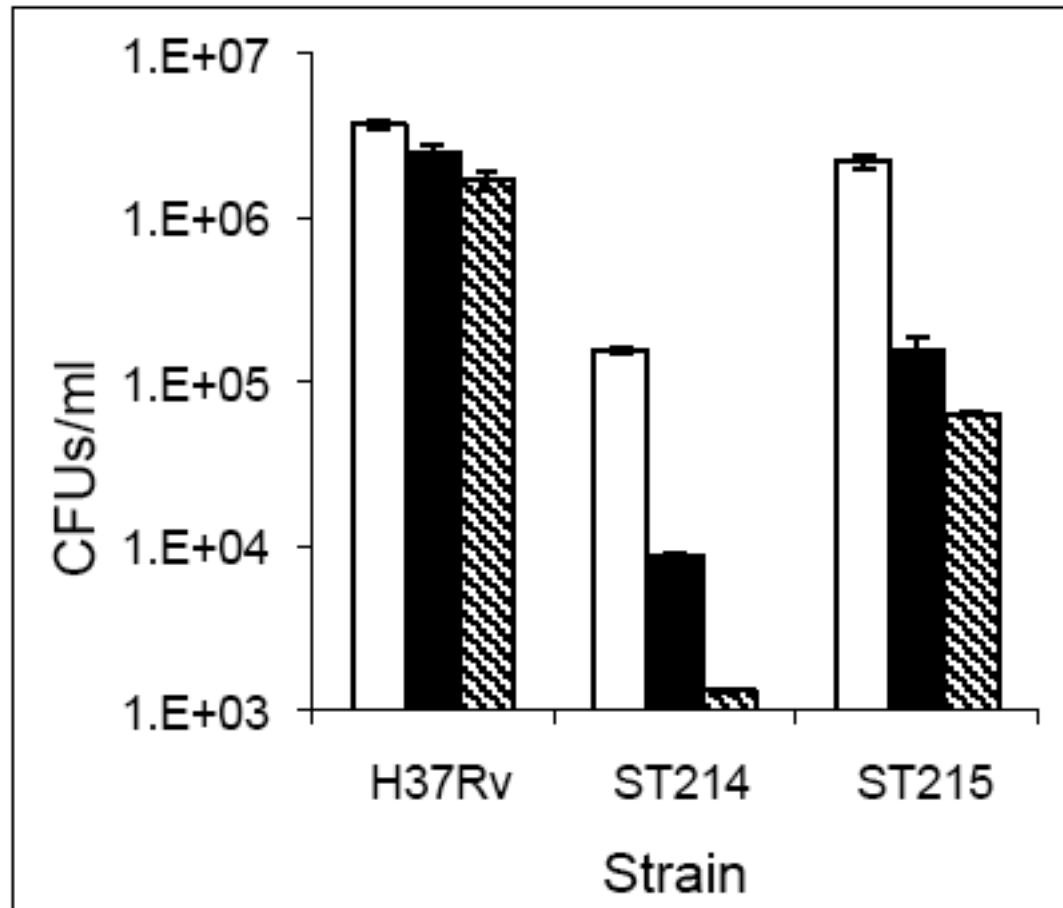

**Figure S4. Sensitivity of the *bfrB* and *bfrA* mutants to nitrite.** The *bfrB* (ST214) and *bfrA* (ST215) mutants and the parental strain H37Rv were exposed to 0 (open bars), 3 mM (dark bars) or 5mM (striped bars) of sodium nitrite at pH 5.5 Each day a sample was taken and dilutions plated onto 7H10. The data shows the mean  $\pm$  standard deviations of the number of CFUs recovered from biological triplicates of each strain at day three.
